# Supplementary material for: Immediate activation of chemosensory neuron gene expression by bacterial metabolites is selectively induced by distinct cyclic GMP-dependent pathways in Caenorhabditis elegans
Source: PubMed Central journal article supplement (PMC7416920; doi:10.1371/journal.pgen.1008505), 2020-08-10
Supplement: pgen.1008505.s007.pdf [file pgen.1008505.s007.pdf]

**S1 Table. All strains used in this study**

| STRAIN | GENOTYPE                                                                                                     |
|--------|--------------------------------------------------------------------------------------------------------------|
| N2     | Wild-Type                                                                                                    |
| FK181  | <i>ksIs2[Pdaf-7::GFP + rol-6(su1006)]</i>                                                                    |
| ZD727  | <i>ksIs2; crh-1(tz2)</i>                                                                                     |
| ZD899* | <i>ksIs2; cng-2(tm4267)</i>                                                                                  |
| ZD882  | <i>ksIs2; cng-2(qd254)</i>                                                                                   |
| ZD887  | <i>ksIs2; gpa-2(pk16) gpa-3(pk35)</i>                                                                        |
| ZD1048 | <i>ksIs2; cmk-1(oy21)</i>                                                                                    |
| ZD1401 | <i>ksIs2; gcy-12(nj10)</i>                                                                                   |
| ZD1922 | <i>ksIs2; egl-4(n478); him-5(e1490)</i>                                                                      |
| ZD1737 | <i>qdEx136[trx-1p::GCaMP5; ofm-1::gfp]</i>                                                                   |
| ZD1949 | <i>ksIs2; egl-4(ad450); him-5(e1490)</i>                                                                     |
| ZD2020 | <i>cng-2(tm4267); qdEx136[trx-1p::GCaMP5; ofm-1p::gfp]</i>                                                   |
| ZD2090 | <i>ksIs2; gcy-12(ks100)</i>                                                                                  |
| ZD2091 | <i>pde-5(nj49) ksIs2</i>                                                                                     |
| ZD2105 | <i>pde-5(nj49) pde-1(nj57) ksIs2</i>                                                                         |
| ZD2150 | <i>pde-1(nj57) ksIs2</i>                                                                                     |
| ZD2151 | <i>pde-5(nj49) pde-1(nj57) ksIs2; pde-3(nj59); pde-2(tm3098)</i>                                             |
| ZD2170 | <i>egl-4(n479); qdEx136[trx-1p::GCaMP5::unc-54 5'UTR; ofm-1p::gfp]</i>                                       |
| ZD2534 | <i>ksIs2; cng-2(qd386)</i>                                                                                   |
| ZD2535 | <i>ksIs2; cng-2(qd387)</i>                                                                                   |
| ZD2250 | <i>ksIs2; cng-2(qd254); qdEx[pJP3(trx-1p::cng-2cDNA::unc-54UTR) + ofm-1p::gfp] Line #1</i>                   |
| ZD2251 | <i>ksIs2; cng-2(qd254); qdEx[pJP3(trx-1p::cng-2cDNA::unc-54UTR) + ofm-1p::gfp] Line #2</i>                   |
| ZD2275 | <i>ksIs2; egl-4(n479ts)</i>                                                                                  |
| ZD2283 | <i>ksIs2; egl-4(ad450) cng-2(qd254)</i>                                                                      |
| ZD2307 | <i>ksIs2; egl-4(n479); qdEx[trx-1p::mCherry::egl-4cDNA + ofm-1p::gfp] Line #1</i>                            |
| ZD2308 | <i>ksIs2; egl-4(n479); qdEx[trx-1p::mCherry::egl-4cDNA + ofm-1p::gfp] Line #2</i>                            |
| ZD2526 | <i>ksIs2; gcy-12(ks100); qdEx[trx-1p::gcy-12cDNA::unc-54UTR + ofm-1p::gfp] Line #1</i>                       |
| ZD2527 | <i>ksIs2; gcy-12(ks100); qdEx[trx-1p::gcy-12cDNA::unc-54UTR + ofm-1p::gfp] Line #2</i>                       |
| ZD2536 | <i>ksIs2; egl-4(n479); qdEx[pJP17(trx-1p::SV40-nls::mCherry::egl-4cDNA::unc54UTR) + ofm-1p::gfp] Line #1</i> |
| ZD2537 | <i>ksIs2; egl-4(n479); qdEx[pJP17(trx-1p::SV40-nls::mCherry::egl-4cDNA::unc54UTR) + ofm-1p::gfp] Line #2</i> |
| ZD2538 | <i>ksIs2; egl-4(n479); qdEx[pJP17(trx-1p::SV40-nls::mCherry::egl-4cDNA::unc54UTR) + ofm-1p::gfp] Line #3</i> |
| ZD2545 | <i>ksIs2; crh-1(tz2); qdEx[pJP13(trx-1p::crh-1cDNA::unc-54UTR) + ofm-1p::gfp] Line #1</i>                    |

|        |                                                                                                            |
|--------|------------------------------------------------------------------------------------------------------------|
| ZD2546 | <i>ksIs2; crh-1(tz2); qdEx[pJP13(trx-1p::crh-1cDNA::unc-54UTR) + ofm-1p::gfp]</i><br>Line #2               |
| ZD2547 | <i>ksIs2; crh-1(tz2); qdEx[pJP13(trx-1p::crh-1cDNA::unc-54UTR) + ofm-1p::gfp]</i><br>Line #3               |
| ZD2598 | <i>ksIs2; egl-4(n479); qdEx[trx-1p::mCherry::egl-4cDNA(T276A,T400A)::unc-54UTR) + ofm-1p::gfp]</i> Line #1 |
| ZD2599 | <i>ksIs2; egl-4(n479); qdEx[trx-1p::mCherry::egl-4cDNA(T276A,T400A)::unc-54UTR) + ofm-1p::gfp]</i> Line #2 |
| ZD2600 | <i>ksIs2; egl-4(n479); qdEx[trx-1p::mCherry::egl-4cDNA(T276A,T400A)::unc-54UTR) + ofm-1p::gfp]</i> Line #3 |

\**tm4267* is currently classified as lethal or sterile by the National BioResource Project of Japan and was originally maintained on a balancer. However, *cng-2(tm4267)* is viable, as we were able to backcross away the linked lethal mutation.
